# Supplementary material
Source: Elsevier journal article supplement (https://www.sciencedirect.com/science/article/pii/S1579212919304161)
Supplement: mmc1 [file S1579212919304161:mmc1.docx]

**MATERIAL SUPLEMENTARIO ONLINE**

**Metodología**

- Capacidad del paciente para realizar actividades básicas de la vida diaria (ABVD) mediante el índice de Barthel, que recoge 10 actividades (alimentación, baño, vestido, aseo, uso de retrete, defecación, micción, deambulación, subir/bajar escaleras y transferencia). Los valores asignados a cada actividad se basan en el tiempo y en la cantidad de ayuda física requerida o si el paciente no puede realizar dicha actividad (0, 5, 10 o 15 puntos). El rango de posibles valores está entre 0 y 100. Entre 20 y 60 puntos supondría dependencia grave, entre 61 y 90 puntos dependencia moderada, entre 91 y 99 dependencia leve y 100 independencia (28).
- Capacidad del paciente para la realización de actividades instrumentales necesarias para vivir de manera independiente en la comunidad mediante el índice de Lawton y Brody. Esta escala valora 8 ítems (capacidad para utilizar el teléfono, hacer compras, preparar adecuadamente la comida, cuidado del hogar, lavado de la ropa, independencia en el uso de medios de transporte, responsabilidad y control respecto a la medicación y una correcta administración de la economía). Se les asigna un número, 1 (independiente) o 0 (dependiente). La puntación final es la suma del valor de todas las respuestas. Respecto a la valoración total se mide de 0 a 8 siendo 0 dependencia absoluta y 8 independencia total (29).
- Riesgo social, fragilidad y dependencia mediante el cuestionario de Barber formado por nueve preguntas de respuesta dicotómica Si/No, entre las que se incluyen si vive solo, si tienen ayuda, limitaciones sociales que le produce su enfermedad o si ha ingresado en el hospital en el último año. Una única respuesta positiva permite clasificar al paciente como dependiente/frágil social según este cuestionario (30).
- Situación social o familiar del paciente mediante la escala de Valoración Sociofamiliar de Gijón. Incluye 5 ítems o variables (situación familiar, situación económica, situación da vivienda, relaciones sociales y el apoyo de la red social) con 5 posibles categorías en cada una de ellas, estableciendo un gradiente desde la situación social ideal o ausencia de problemática, hasta la detección de alguna circunstancia o problema social. Su interpretación está medida por intervalos según la puntuación total: “Buena/aceptable situación social” entre 5 y 9, “Existencia de riesgo social” entre 10 y 14 puntos, y “Problemática social” cuando se superan los 15 puntos (31).
- Sobrecarga del cuidador mediante el test de Zarit, que analiza cómo se sienten los cuidadores en base a 22 preguntas específicas con 5 posibilidades de respuesta para cada una de ellas que depende de la frecuencia de esos sentimientos por parte del cuidador: 1 (nunca), 2 (de vez en cuando), 3 (algunas veces), 4 (bastantes veces) y 5 (casi siempre).La interpretación, está medida en intervalos: Menos de 47 puntos sería “No sobrecarga”, entre 47 y 55 “sobrecarga moderada” y mayor de 55 puntos, “sobrecarga intensa” (32).

**Resultados**

**Tabla 1S. Resultados de las distintas valoraciones incluidas en el índice de Barthel de forma global y en función del género**

| **Items** | **Total**  **(253)** | **Hombre**  **(195)** | **Mujer**  **(58)** | **p** |
| --- | --- | --- | --- | --- |
| Dependencia alimentación (%) | 33 (13,1) | 24 (12,3) | 9 (15,5) | 0,78 |
| Dependencia baño (%) | 73 (28,9) | 58 (29,7) | 15 (25,9) | 0,57 |
| Dependencia vestido (%) | 81 (32) | 65 (33,3) | 16 (27,6) | 0,51 |
| Dependencia aseo (%) | 35 (13,8) | 25 (12,8) | 10 (17,2) | 0,39 |
| Dependencia uso de retrete (%) | 48 (18,6) | 37 (19) | 10 (17,2) | 0,19 |
| Dependencia defecación (%) | 38 (15,1) | 28 (14,4) | 10 (17,2) | 0,60 |
| Dependencia micción (%) | 36 (14,3) | 26 (13,3) | 10 (17,2) | 0,73 |
| Dependencia deambulación (%) | 54 (21,4) | 45 (23,1) | 9 (15,5) | 0,21 |
| Dependencia subir y bajar escaleras (%) | 70 (27,8) | 61 (31,3) | 9 (15,5) | 0,03 |
| Dependencia transferencia (%) | 37 (14,6) | 30 (15,4) | 7 (12,1) | 0,81 |

**Tabla 2S. Resultados de las distintas valoraciones incluidas en el índice de Lawton y Brody de forma global y en función del género.**

|  | **Total**  **(253)** | **Hombre**  **(195)** | **Mujer**  **(58)** | **p** |
| --- | --- | --- | --- | --- |
| Dependencia uso del teléfono (%) | 38 (15) | 30 (15,4) | 8 (13,8) | 0,77 |
| Dependencia hacer compras (%) | 133 (52,6) | 109 (55,9) | 24 (41,4) | 0,05 |
| Dependencia hacer la comida (%) | 157 (62,1) | 133 (68,2) | 24 (41,4) | 0,0001 |
| Dependencia realizar tareas domésticas (%) | 132 (52,2) | 113 (57,9) | 19 (32,8) | 0,001 |
| Dependencia lavar la ropa (%) | 132 (52,2) | 117 (60) | 15 (25,9) | 0,0001 |
| Dependencia uso transporte (%) | 72 (28,5) | 58 (29,7) | 14 (24,1) | 0,41 |
| Dependencia control de la medicación (%) | 73 (28,9) | 64 (32,8) | 9 (15,5) | 0,007 |
| Dependencia realización de gestiones económicas (%) | 67 (26,5) | 57 (29,2) | 10 (17,2) | 0,06 |

**Tabla 3S. Resultados de las distintas valoraciones incluidas en el Cuestionario de Barber de forma global y en función del género.**

| **Items** | **Total**  **(253)** | **Hombre**  **(195)** | **Mujer**  **(58)** | **P** |
| --- | --- | --- | --- | --- |
| Barber 1. Vivir solo (%) | 54 (21,4) | 32 (16,5) | 22 (37,9) | 0,001 |
| Barber 2. Sin nadie que le preste ayuda (%) | 18 (7,1) | 15 (7,7) | 3 (5,2) | 0,77 |
| Barber 3. Más de dos días semanales que no come caliente (%) | 14 (5,5) | 11 (5,6) | 3 (5,2) | 0,9 |
| Barber 4. Precisa ayuda a menudo (%) | 116 (45,8) | 93 (47) | 23 (39,7) | 0,28 |
| Barber 5. Su salud le impide salir a al calle (%) | 40 (15,8) | 28 (14,4) | 12 (20,7) | 0,25 |
| Barber 6. No se vale por si mismo (%) | 92 (36,4) | 74 (37,9) | 18 (31) | 0,33 |
| Barber 7. Dificultades limitantes de visión (%) | 34 (13,4) | 28 (14,4) | 6 (10,3) | 0,43 |
| Barber 8. Dificultades limitantes de audición (%) | 68 (26,9) | 57 (29,2) | 11 (19) | 0,12 |
| Barber 9. Ha ingresado en el último año en el hospital (%) | 132 (52,2) | 105 (53,8) | 27 (46,6) | 0,32 |

**Tabla 4S. Resultados de las distintas valoraciones incluidas en el Cuestionario Socio-familiar de Gijón de forma global y en función del género.**

|  | **Total**  **(253)** | **Hombre**  **(195)** | **Mujer**  **(58)** | **P** |
| --- | --- | --- | --- | --- |
| Gijón A. Situación familiar1 | 2,6 ± 1,3 | 2,5 ± 1,3 | 2,9 ± 1,3 | 0,03 |
| Gijón B. Situación económica1 | 2,3 ± 0,9 | 2,2 ± 0,7 | 2,8 ± 1,1 | 0,001 |
| Gijón C. Vivienda1 | 1,8 ± 0,8 | 1,8 ± 0,8 | 1,8 ± 0,8 | 0,97 |
| Gijón D. Relaciones sociales1 | 2,7 ± 1,2 | 2,7 ± 1,2 | 2,6 ± 1,1 | 0,36 |
| Gijón E. Apoyos de red social1 | 1,4 ± 0,8 | 1,3 ± 0,7 | 1,4 ± 0,8 | 0,66 |

1Expresado como media ± desviación estándar
